# Supplementary material
Source: HighWire-hosted journal article supplement (https://gut.bmj.com/content/gutjnl-2022-327293)
Supplement: inline-supplementary-material-1 [file inline-supplementary-material-1.pdf]

**Supplementary data.****METHODS****Participants**

To be eligible for randomisation, patients were required to have completed the daily diary on at least 11 of 14 days ( $\geq 75\%$ ) during the screening period. Exclusion criteria were loose stools (BSFS 6 or 7) on less than 3 days during screening period, and average abdominal pain  $< 2.5$  during the 14-day screening period. This was amended from an initial average abdominal pain score of  $< 3$ , in response to the relatively high numbers of patients failing this criterion.

**Trial management**

A trial management group was set up to manage the trial from design to implementation. The group held regular meetings to monitor trial progress and to decide on any other management issues. A trial steering committee (TSC) was also set up to provide scientific advice during protocol development and throughout the trial. An Independent Data Monitoring Committee held two meetings during the trial to review blinded safety and efficacy data.

**Multiple imputation**

The number of weeks requiring at least one missing value of abdominal pain or stool consistency to be imputed were;

- Placebo = 462/1,720 (26.9%)
- Enterosgel = 489/1,728 (28.3%)

For weeks that required at least one missing value of abdominal pain or stool consistency to be imputed, the average number of missing values was:

- Placebo (median and interquartile range) = 4 (2 to 6)
- Enterosgel (median and interquartile range) = 6 (4 to 8)

The maximum permissible number of missing values within a week was 14 (7 for abdominal pain and 7 for stool consistency).

**Table S1.** Diary completion and adherence to study treatment during double-blind phase

|                                                               | Placebo (n=221) |            | Enterosgel (n=219) |            |
|---------------------------------------------------------------|-----------------|------------|--------------------|------------|
| Number of days patient diary was completed                    | 55              | (47 to 56) | 54                 | (48 to 56) |
| Number of days study treatment was used                       | 50              | (42 to 53) | 49                 | (41 to 52) |
| Number of days that doses of study treatment were used, n (%) |                 |            |                    |            |
| 0 doses                                                       | 283             | (2.8)      | 546                | (5.5)      |
| 1 dose                                                        | 1137            | (11.3)     | 1849               | (18.5)     |
| 2 doses                                                       | 3972            | (39.5)     | 4535               | (45.4)     |
| 3 doses                                                       | 1487            | (14.8)     | 1016               | (10.2)     |
| 4 doses                                                       | 2535            | (25.2)     | 1616               | (16.2)     |
| 5 doses                                                       | 90              | (0.9)      | 94                 | (0.9)      |
| 6 doses                                                       | 543             | (5.4)      | 338                | (3.4)      |
| 7+ doses                                                      | 13              | (0.1)      | 6                  | (0.1)      |

Data are reported as Median (IQR) and range, out of 56-day double-blind phase

**Table S2.** Diary completion and adherence to study treatment during open-label phase

|                                                               | Placebo (n=221) |            | Enterosgel (n=219) |            |
|---------------------------------------------------------------|-----------------|------------|--------------------|------------|
| Number of days patient diary was completed                    | 52              | (39 to 56) | 51                 | (40 to 56) |
| Number of days study treatment was used                       | 49              | (32 to 53) | 47                 | (33 to 53) |
| Number of days that doses of study treatment were used, n (%) |                 |            |                    |            |
| 0 doses                                                       | 406             | (4.5)      | 470                | (5.3)      |
| 1 dose                                                        | 1755            | (19.3)     | 1978               | (22.2)     |
| 2 doses                                                       | 4231            | (46.4)     | 3900               | (43.8)     |
| 3 doses                                                       | 1078            | (11.8)     | 819                | (9.2)      |
| 4 doses                                                       | 1136            | (12.5)     | 1356               | (15.2)     |
| 5 doses                                                       | 61              | (0.7)      | 139                | (1.6)      |
| 6 doses                                                       | 418             | (4.6)      | 244                | (2.7)      |
| 7+ doses                                                      | 28              | (0.3)      | 6                  | (0.1)      |

Data are reported as Median (IQR) and range, out of 56-day double-blind phase

**Table S3.** Analysis of study period responders in double-blind phase (ITT population) by multiple imputation: the table shows responder rates for composite (primary outcome) and individual stool consistency and abdominal pain.

| Study period responder                           | Placebo | Enterosgel | Odds ratio (95%CI)* | p value |
|--------------------------------------------------|---------|------------|---------------------|---------|
| Primary outcome                                  | n=215   | n=216      | 1.89 (1.21-2.97)    | 0.0054  |
| Primary outcome (excluding Weeks with <4 values) | n=214   | n=214      | 1.94 (1.25-3.00)    | 0.0030  |
| <b>Stool consistency</b>                         |         |            |                     |         |
| All weeks                                        | n=215   | n=216      | 2.0 (1.31 to 3.06)  | 0.0014  |
| Excluding Weeks with <4 values                   | n = 214 | n = 214    | 1.93 (1.30 to 2.85) | 0.0011  |
| <b>Abdominal pain</b>                            |         |            |                     |         |
| All weeks                                        | n=215   | n=216      | 1.62 (1.08 to 2.45) | 0.0207  |
| Excluding Weeks with <7 values                   | n = 214 | n = 214    | 1.72 (1.16 to 2.56) | 0.0074  |

Data are reported as number of patients, and odds ratio (range)  
\*Adjusted for age and sex

**Table S4.** Analysis of the primary outcome in double-blind phase (PP population)

| Study period responder                               | Placebo       | Enterosgel    | Odds ratio (95%CI)* | p value |
|------------------------------------------------------|---------------|---------------|---------------------|---------|
| Observed data (excluding Weeks with <4 values)       | 52/212 (24.5) | 80/208 (38.5) | 2.02 (1.32 to 3.10) | 0.00129 |
| Observed data (excluding Weeks with <7 values)       | 37/206 (18.0) | 61/199 (30.7) | 2.11 (1.31 to 3.39) | 0.00216 |
| Multiple imputation                                  | n=212         | n=208         | 1.96 (1.25 to 3.07) | 0.00340 |
| Multiple imputation (excluding Weeks with <4 values) | n=212         | n=208         | 2.00 (1.29 to 3.10) | 0.00198 |

Data are reported as number of patients, proportion (%), and odds ratio (range)  
\*Adjusted for age and sex

**Table S5.** Analysis of the stool consistency and abdominal pain in double-blind phase (ITT population) by multiple imputation

| Model                                                        | Placebo | Enterosgel | Treatment effect<br>(95%CI)* |                  | p value |
|--------------------------------------------------------------|---------|------------|------------------------------|------------------|---------|
| <b>Stool consistency</b>                                     |         |            |                              |                  |         |
| Days ≥ 1 stool of BSFS 6/7 (week 1-4)#                       | n=215   | n=216      | -0.52 (-0.79 to -0.25)       |                  | 0.0002  |
| Days ≥ 1 stool of BSFS 6/7 (week 5-8)‡                       | n=215   | n=216      | -0.68 (-1.00 to -0.36)       |                  | <0.0001 |
| <b>Abdominal pain</b>                                        |         |            |                              |                  |         |
| Mean score (week 1-8)                                        | n=215   | n=216      | -0.38 (-0.63 to -0.13)       |                  | 0.0027  |
| Mean score (week 5-8)                                        | n=215   | n=216      | -0.51 (-0.81 to -0.20)       |                  | 0.0011  |
| <b>Stool consistency (excluding weeks with &lt;4 values)</b> |         |            |                              |                  |         |
| Days ≥ 1 stool of BSFS 6/7 (week 1-4)#                       | n = 214 | n = 214    | -0.50                        | (-0.79 to -0.21) | 0.00079 |
| Days ≥ 1 stool of BSFS 6/7 (week 5-8)‡                       | n = 198 | n = 198    | -0.67                        | (-1.01 to -0.33) | 0.00014 |
| <b>Abdominal pain (excluding weeks with &lt;4 values)</b>    |         |            |                              |                  |         |
| Mean score (week 1-8)                                        | n = 214 | n = 214    | -0.35                        | (-0.62 to -0.09) | 0.00835 |
| Mean score (week 5-8)                                        | n = 198 | n = 198    | -0.49                        | (-0.82 to -0.17) | 0.00314 |

Data are reported as mean (SD) and treatment effect (mean days, mean pain score)  
\* Adjusted for age, sex, and the baseline measure of the outcome  
† Mean number of days per week with at least one stool of BSFS type 6 or 7 over

**Table S6.** Analysis of the secondary questionnaire outcomes in double-blind phase (ITT population)

| Model                        | Placebo                   | Enterosgel                | Treatment effect<br>(95%CI)* | p value |
|------------------------------|---------------------------|---------------------------|------------------------------|---------|
| <b>IBS-SSS</b>               |                           |                           |                              |         |
| Total score over 8 weeks     | 255.17 (239.60 to 270.74) | 207.29 (191.64 to 222.94) | -37.27 (-57.08 to -17.46)    | 0.00023 |
| Total score during weeks 1-4 | 270.26 (254.27 to 286.24) | 231.40 (215.33 to 247.47) | -28.63 (-49.09 to -8.17)     | 0.00610 |
| Total score during weeks 5-8 | 240.84 (224.90 to 256.78) | 184.49 (168.47 to 200.51) | -45.69 (-66.08 to -25.30)    | 0.00001 |
| <b>IBS-QoL</b>               |                           |                           |                              |         |
| Total score over 8 weeks     | 55.24 (52.02 to 58.47)    | 60.88 (57.64 to 64.12)    | 5.01 (1.78 to 8.24)          | 0.00238 |
| Total score during weeks 1-4 | 52.14 (48.72 to 55.56)    | 56.41 (52.95 to 59.86)    | 3.60 (-0.03 to 7.22)         | 0.05162 |
| Total score during weeks 5-8 | 57.67 (54.33 to 61.02)    | 64.00 (60.65 to 67.35)    | 5.77 (2.30 to 9.23)          | 0.00110 |
| <b>PHQ-12 SS</b>             |                           |                           |                              |         |

|                                                                  |                        |                        |                         |         |
|------------------------------------------------------------------|------------------------|------------------------|-------------------------|---------|
| Mean total score over 8 weeks                                    | 6.68 (6.16 to 7.20)    | 6.54 (6.02 to 7.07)    | -0.19 (-0.74 to 0.37)   | 0.51295 |
| Mean total score at week 4                                       | 7.19 (6.62 to 7.76)    | 7.18 (6.60 to 7.75)    | -0.08 (-0.72 to 0.56)   | 0.80618 |
| Mean total score at week 8                                       | 6.28 (5.73 to 6.83)    | 6.11 (5.56 to 6.66)    | -0.21 (-0.82 to 0.39)   | 0.48872 |
| Mean headache score over 8 weeks                                 | 0.72 (0.63 to 0.81)    | 0.75 (0.66 to 0.84)    | 0.01 (-0.09 to 0.12)    | 0.79332 |
| Mean headache score at week 4                                    | 0.79 (0.68 to 0.89)    | 0.80 (0.69 to 0.91)    | 0.00 (-0.13 to 0.13)    | 0.97179 |
| Mean headache score at week 8                                    | 0.67 (0.57 to 0.76)    | 0.71 (0.61 to 0.81)    | 0.03 (-0.09 to 0.15)    | 0.62198 |
| Mean tiredness score over 8 weeks                                | 1.28 (1.19 to 1.37)    | 1.28 (1.19 to 1.37)    | -0.01 (-0.12 to 0.10)   | 0.83306 |
| Mean tiredness score at week 4                                   | 1.37 (1.27 to 1.47)    | 1.44 (1.34 to 1.55)    | 0.05 (-0.08 to 0.18)    | 0.46297 |
| Mean tiredness score at week 8                                   | 1.20 (1.10 to 1.30)    | 1.16 (1.06 to 1.26)    | -0.05 (-0.17 to 0.07)   | 0.43875 |
| Mean sleep score over 8 weeks                                    | 1.10 (1.00 to 1.20)    | 1.07 (0.97 to 1.17)    | -0.06 (-0.18 to 0.06)   | 0.31410 |
| Mean sleep score at week 4                                       | 1.20 (1.08 to 1.31)    | 1.16 (1.05 to 1.28)    | -0.06 (-0.21 to 0.08)   | 0.39173 |
| Mean sleep score at week 8                                       | 1.02 (0.91 to 1.13)    | 1.00 (0.89 to 1.11)    | -0.05 (-0.19 to 0.08)   | 0.44957 |
| <b>WPA:IBS</b>                                                   |                        |                        |                         |         |
| Mean % of work time missed due to IBS symptoms over 8 weeks      | 3.82 (2.02 to 5.61)    | 2.86 (1.01 to 4.71)    | -1.50 (-3.90 to 0.90)   | 0.22123 |
| Mean % impairment while working due to IBS symptoms over 8 weeks | 35.66 (31.78 to 39.54) | 29.98 (25.99 to 33.97) | -5.51 (-10.72 to -0.30) | 0.03813 |
| Mean % overall work impairment due to IBS over 8 weeks           | 36.72 (32.74 to 40.70) | 30.97 (26.88 to 35.07) | -5.38 (-10.69 to -0.06) | 0.04752 |
| Mean % activity impairment due to IBS symptoms over 8 weeks      | 41.30 (37.75 to 44.84) | 34.80 (31.25 to 38.35) | -7.42 (-11.61 to -3.24) | 0.00051 |

Data are reported as Mean (SD) or treatment effect (range)

\* Adjusted for age, sex, and (for continuous outcomes) the baseline measure of the outcome

‡ Proportion of patients reporting adequate relief (range)

^ Mean number of days per week loperamide used

**Table S7.** Analysis of study period responders in open-label phase (ITT population): the table shows responder rates for composite (primary outcome) and individual stool consistency and abdominal pain.

| Study period responder                                           | Open-label phase | Odds ratio (95%CI)* | p value |
|------------------------------------------------------------------|------------------|---------------------|---------|
| <b>Randomised to placebo</b>                                     |                  |                     |         |
| Primary outcome observed data (excluding Weeks with <7 values)   | 68/175 (38.9)    | 4.56 (2.21-9.37)    | <0.0001 |
| Stool consistency observed data (excluding weeks with <7 values) | 94/175 (53.7)    | 3.80 (1.89 to 7.63) | 0.0002  |
| Abdominal pain observed data (excluding weeks with <7 values)    | 87/175 (49.7)    | 2.38 (1.25 to 4.56) | 0.0085  |
| <b>Randomised to Enterosgel</b>                                  |                  |                     |         |
| Primary outcome observed data (excluding Weeks with <7 values)   | 72/173 (41.6)    | 2.00 (1.03-3.89)    | 0.0413  |
| Stool consistency observed data (excluding weeks with <7 values) | 88/173 (50.9)    | 0.68 (0.35 to 1.31) | 0.25271 |
| Abdominal pain observed data (excluding weeks with <7 values)    | 98/173 (56.6)    | 1.35 (0.72 to 2.53) | 0.34462 |

Data are reported as number of patients, proportion (%), and odds ratio (range)  
\*Odds ratio for the open-label phase versus the double-blind phase

**Table S8.** Analysis of the stool consistency and abdominal pain in open label phase (ITT population) by multiple imputation

| Model                    | Placebo | Odds Ratio<br>(95%CI)* | p value  | Enterosgel | Odds Ratio<br>(95%CI)* | p value |
|--------------------------|---------|------------------------|----------|------------|------------------------|---------|
| <b>Stool consistency</b> |         |                        |          |            |                        |         |
| Study period responder   | n = 196 | 9.18 (3.81 to 22.13)   | <0.00001 | n = 188    | 2.04 (1.04 to 4.00)    | 0.03786 |
| <b>Abdominal pain</b>    |         |                        |          |            |                        |         |
| Study period responder   | n=196   | 7.40 (2.92 to 18.76)   | 0.00003  | n = 188    | 4.34 (2.07 to 9.13)    | 0.00012 |

Data are reported as number of patients, and odds ratio (range)  
\* Effect for the open-label phase versus the double-blind phase;

Table S9. Analysis of the secondary outcomes in open label phase

| Model                                  | Placebo allocation  | Time effect (95%CI)*   | p value  | Enterosgel allocation | Time effect (95%CI)*   | p value  |
|----------------------------------------|---------------------|------------------------|----------|-----------------------|------------------------|----------|
| <b>Stool consistency</b>               |                     |                        |          |                       |                        |          |
| Days ≥ 1 stool of BSFS 6/7 (week 1-8)‡ | 1.85 (1.63 to 2.07) | -1.04 (-1.14 to -0.93) | <0.00001 | 1.78 (1.57 to 1.99)   | -0.42 (-0.52 to -0.32) | <0.00001 |
| <b>Abdominal pain</b>                  |                     |                        |          |                       |                        |          |
| Mean score (week 1-8)                  | 3.17 (2.92 to 3.41) | -0.86 (-0.91 to -0.81) | <0.00001 | 2.84 (2.59 to 3.08)   | -0.76 (-0.81 to -0.71) | <0.00001 |
| <b>Stool frequency</b>                 |                     |                        |          |                       |                        |          |
| Mean number daily stools (week 1-8)    | 2.48 (2.26 to 2.70) | -0.41 (-0.46 to -0.37) | <0.00001 | 2.34 (2.16 to 2.52)   | -0.24 (-0.28 to -0.20) | <0.00001 |
| <b>Bloating</b>                        |                     |                        |          |                       |                        |          |
| Mean bloating score (week 1-8)         | 2.50 (2.30 to 2.69) | -0.65 (-0.73 to -0.56) | <0.00001 | 2.31 (2.12 to 2.50)   | -0.42 (-0.51 to -0.34) | <0.00001 |
| <b>Urgency</b>                         |                     |                        |          |                       |                        |          |
| Mean urgency score (week 1-8)          | 2.29 (2.10 to 2.47) | -0.81 (-0.89 to -0.72) | <0.00001 | 2.18 (2.00 to 2.37)   | -0.33 (-0.41 to -0.24) | <0.00001 |
| <b>Adequate relief</b>                 |                     |                        |          |                       |                        |          |
| Proportion (week 1-8) #                | 0.66 (0.57 to 0.73) | 5.43 (4.35 to 6.78)    | <0.00001 | 0.72 (0.64 to 0.79)   | 2.11 (1.70 to 2.63)    | <0.00001 |
| <b>Loperamide use</b>                  |                     |                        |          |                       |                        |          |
| Mean number of days (week 1-8)^        | 1.11 (0.84 to 1.37) | -0.35 (-0.44 to -0.27) | <0.00001 | 0.91 (0.70 to 1.13)   | -0.06 (-0.14 to 0.02)  | 0.1204   |

Data are reported as Mean (range) and time effect (95% CI)

\* Effect for the open-label phase versus the double-blind phase separated into treatment allocation in double-blind phase, adjusted for age, sex, and (where possible, for continuous outcomes) the baseline measure of the outcome

‡ Mean number of days per week with at least one stool of BSFS type 6 or 7 over

# Proportion of patients reporting adequate relief (range)

^ Mean number of days per week loperamide used

**Table S10.** Analysis of the secondary questionnaire outcomes in open-label phase (ITT population)

| Model                                                            | Placebo allocation        | Time effect (95%CI)*      | p value  | Enterosgel allocation     | Time effect (95%CI)*      | p value  |
|------------------------------------------------------------------|---------------------------|---------------------------|----------|---------------------------|---------------------------|----------|
| <b>IBS-SSS</b>                                                   |                           |                           |          |                           |                           |          |
| Total score over 8 weeks                                         | 186.65 (171.00 to 202.30) | -67.38 (-73.62 to -61.14) | <0.00001 | 164.71 (149.78 to 179.65) | -43.82 (-49.76 to -37.87) | <0.00001 |
| <b>IBS-QoL</b>                                                   |                           |                           |          |                           |                           |          |
| Total score over 8 weeks                                         | 65.06 (61.93 to 68.19)    | 9.68 (7.99 to 11.37)      | <0.00001 | 68.69 (65.41 to 71.97)    | 7.69 (5.94 to 9.45)       | <0.00001 |
| <b>PHQ-12 SS</b>                                                 |                           |                           |          |                           |                           |          |
| Mean total score over 8 weeks                                    | 5.94 (5.41 to 6.47)       | -0.74 (-1.07 to -0.40)    | 0.00002  | 5.79 (5.25 to 6.33)       | -0.76 (-1.07 to -0.46)    | <0.00001 |
| Mean headache score over 8 weeks                                 | 0.67 (0.58 to 0.76)       | -0.05 (-0.13 to 0.03)     | 0.19111  | 0.69 (0.59 to 0.78)       | -0.06 (-0.13 to 0.01)     | 0.09232  |
| Mean tiredness score over 8 weeks                                | 1.11 (1.02 to 1.20)       | -0.17 (-0.25 to -0.10)    | 0.00001  | 1.23 (1.13 to 1.32)       | -0.05 (-0.13 to 0.02)     | 0.17102  |
| Mean sleep score over 8 weeks                                    | 0.99 (0.89 to 1.09)       | -0.11 (-0.19 to -0.03)    | 0.00783  | 1.05 (0.94 to 1.15)       | -0.02 (-0.09 to 0.06)     | 0.65376  |
| <b>WPA:IBS</b>                                                   |                           |                           |          |                           |                           |          |
| Mean % of work time missed due to IBS symptoms over 8 weeks      | 2.87 (1.09 to 4.65)       | -0.94 (-1.88 to -0.00)    | 0.04885  | 1.54 (0.26 to 2.82)       | -1.54 (-2.56 to -0.52)    | 0.00306  |
| Mean % impairment while working due to IBS symptoms over 8 weeks | 27.57 (23.77 to 31.37)    | -8.51 (-10.19 to -6.82)   | <0.00001 | 23.57 (19.79 to 27.35)    | -6.95 (-8.58 to -5.32)    | <0.00001 |
| Mean % overall work impairment due to IBS over 8 weeks           | 28.32 (24.44 to 32.20)    | -8.79 (-10.52 to -7.06)   | <0.00001 | 24.13 (20.26 to 28.00)    | -7.53 (-9.25 to -5.82)    | <0.00001 |
| Mean % activity impairment due to IBS symptoms over 8 weeks      | 31.34 (27.85 to 34.83)    | -9.98 (-11.30 to -8.65)   | <0.00001 | 27.57 (24.19 to 30.94)    | -7.63 (-8.94 to -6.31)    | <0.00001 |

Data are reported as Mean (range) and time effect (95% CI)  
\* Effect for the open-label phase versus the double-blind phase separated into treatment allocation in double-blind phase, adjusted for age, sex, and (where possible, for continuous outcomes) the baseline measure of the outcome

**Table S11.** Outcomes during the follow-up phase.

|                                                                                  |                              |
|----------------------------------------------------------------------------------|------------------------------|
| Outcomes assessed during follow-up phase (ITT population)                        | N, % (95% CI)                |
| Number of patients reporting adequate relief at the start of the follow-up phase | 264/348 75.9%                |
| Percentage of patients who report an increased or maintained                     | 186/251 74.1% (68.3 to 79.2) |



|                                                                                                         |         |       |                |
|---------------------------------------------------------------------------------------------------------|---------|-------|----------------|
| treatment benefit at 8 weeks                                                                            |         |       |                |
| Percentage of patients who report having used Enterosgel in the last 8 weeks                            | 203/252 | 80.6% | (75.2 to 85.0) |
| Frequency of use of Enterosgel in the last 8 weeks                                                      |         |       |                |
| Occasionally                                                                                            | 52/203  | 25.6% | (20.1 to 32.1) |
| 1-2 days per week                                                                                       | 22/203  | 10.8% | (7.2 to 15.9)  |
| 2-3 days per week                                                                                       | 23/203  | 11.3% | (7.6 to 16.5)  |
| Most days                                                                                               | 106/203 | 52.2% | (45.3 to 59.0) |
| Percentage of patients who report having used less Loperamide in the last 8 weeks than before the trial | 133/250 | 53.2% | (47.0 to 59.3) |

**Table S12.** Adverse Events during the double-blind and open label phase in the safety population; possibly, probably or definitely related to treatment

| Adverse event term                         | Placebo* | Enterosgel* | Open label |
|--------------------------------------------|----------|-------------|------------|
| Nausea                                     | 8        | 8           | 0          |
| abdominal pain                             | 4        | 3           | 4          |
| bloating                                   | 3        | 6           | 3          |
| flatulence                                 | 0        | 1           | 3          |
| Constipation                               | 2        | 2           | 2          |
| dry mouth                                  | 2        | 1           | 0          |
| backpain                                   | 0        | 2           | 1          |
| loss of appetite                           | 0        | 2           | 0          |
| headache                                   | 2        | 2           | 0          |
| upset stomach/indigestion                  | 0        | 0           | 2          |
| burning sensation in throat                | 1        | 0           | 0          |
| diarrhoea and vomiting                     | 1        | 0           | 1          |
| increased frequency of defecation          | 0        | 1           | 1          |
| vomiting symptom                           | 0        | 1           | 1          |
| diarrhoea                                  | 1        | 0           | 0          |
| faeces colour: yellow                      | 1        | 0           | 0          |
| haemorrhoidal bleeding due to constipation | 1        | 0           | 0          |
| heartburn                                  | 1        | 0           | 0          |

|                                           |   |   |   |
|-------------------------------------------|---|---|---|
| increased frequency of defecation         | 1 | 0 | 0 |
| perianal bleeding                         | 1 | 0 | 0 |
| right flank pain                          | 1 | 0 | 0 |
| suicidal thoughts                         | 1 | 0 | 0 |
| thirst post dosing                        | 1 | 0 | 0 |
| cough                                     | 0 | 1 | 0 |
| lethargy                                  | 0 | 1 | 0 |
| nocturnal diarrhoea                       | 0 | 1 | 0 |
| sensation of incomplete emptying of bowel | 0 | 1 | 0 |
| heartburn                                 | 0 | 0 | 1 |
| faecal urgency                            | 0 | 0 | 1 |

Data presented is for AE terms that are possibly, probably or definitely related to treatment.  
\*Double-blind phase
